# Supplementary material for: Revealing Three-Dimensional Variations in Fuel Structures in Subtropical Forests through Backpack Laser Scanning
Source: MDPI journal article supplement (doi:10.3390/f15010155), 2024-01-11
Supplement: s1 [file s1]

# Supplementary Materials

**Table S1.** Detail information of each forest plot.

| ID | Stand type | Longitude  | Latitude  | Elevation (m) | Slope (°) | Aspect | Mean Tree Height | Mean DBH | Mean CBH | Tree Number |
|----|------------|------------|-----------|---------------|-----------|--------|------------------|----------|----------|-------------|
| 1  | MP         | 114.754289 | 25.639831 | 155           | 10        | sunny  | 12.5             | 14       | 3        | 24          |
| 2  | MP         | 114.751832 | 25.632683 | 175           | 15        | shady  | 11               | 13       | 2.5      | 25          |
| 3  | MP         | 114.743362 | 25.634808 | 199           | 15        | shady  | 12               | 12       | 2        | 19          |
| 4  | MP         | 114.742018 | 25.635040 | 185           | 30        | sunny  | 9                | 12       | 1.5      | 18          |
| 5  | MP         | 114.761347 | 25.635474 | 178           | 18        | shady  | 10               | 13       | 2        | 23          |
| 6  | MP         | 115.638924 | 26.247082 | 234           | 35        | shady  | 15               | 11       | 4        | 25          |
| 7  | MP         | 115.600024 | 26.188400 | 217           | 40        | sunny  | 6                | 17       | 5        | 20          |
| 8  | MP         | 115.671709 | 26.257810 | 266           | 28        | sunny  | 10               | 17       | 4        | 20          |
| 9  | MP         | 115.637054 | 26.246835 | 241           | 30        | sunny  | 20               | 18       | 6        | 29          |
| 10 | EP         | 115.683916 | 26.253215 | 232           | 35        | shady  | 15               | 16       | 5        | 21          |
| 11 | EP         | 115.618437 | 26.227696 | 309           | 45        | sunny  | 18               | 17       | 6        | 31          |
| 12 | EP         | 115.585221 | 26.277520 | 294           | 30        | sunny  | 16               | 20       | 7        | 31          |
| 13 | EP         | 115.599839 | 26.187363 | 208           | 10        | sunny  | 18               | 21       | 8        | 28          |
| 14 | EP         | 115.597110 | 26.184408 | 226           | 25        | sunny  | 15               | 17       | 9        | 18          |
| 15 | EP         | 115.670396 | 26.261018 | 273           | 38        | shady  | 8                | 13       | 5        | 17          |
| 16 | CL         | 115.211186 | 25.239394 | 327           | 42        | shady  | 17               | 18       | 5        | 32          |
| 17 | CL         | 115.164185 | 25.284438 | 298           | 30        | shady  | 15               | 13       | 3        | 45          |
| 18 | CL         | 115.180526 | 25.243812 | 289           | 28        | shady  | 14               | 15       | 5        | 38          |
| 19 | CL         | 115.201262 | 25.271954 | 274           | 10        | shady  | 16               | 18       | 5        | 20          |
| 20 | CL         | 115.200041 | 25.272679 | 278           | 20        | shady  | 12               | 13       | 5        | 40          |
| 21 | BL         | 114.744322 | 25.634500 | 203           | 40        | shady  | 15               | 15       | 3        | 36          |
| 22 | BL         | 114.757964 | 25.634180 | 126           | 45        | shady  | 16               | 16       | 5        | 20          |
| 23 | BL         | 114.750327 | 25.633820 | 159           | 25        | sunny  | 14               | 14       | 6        | 32          |
| 24 | BL         | 114.743638 | 25.635037 | 184           | 25        | shady  | 13               | 15       | 3        | 31          |
| 25 | BL         | 114.760963 | 25.622616 | 198           | 35        | shady  | 22               | 19       | 5        | 27          |
| 26 | CBM        | 114.692381 | 25.583559 | 177           | 35        | shady  | 14               | 12       | 4        | 40          |
| 27 | CBM        | 114.754267 | 25.638031 | 154           | 33        | shady  | 16               | 15       | 5        | 20          |
| 28 | CBM        | 114.754363 | 25.635437 | 152           | 36        | sunny  | 13               | 13       | 5        | 33          |
| 29 | CBM        | 114.767974 | 25.633865 | 139           | 39        | shady  | 12               | 12       | 3        | 25          |
| 30 | CBM        | 114.769192 | 25.634552 | 134           | 45        | shady  | 13               | 15       | 4        | 21          |

**Notes:** MP stood for *P. massoniana* forest, EP stood for *Pinus elliottii* forest, CL stood for *C. lanceolata* forest, BL stood for of mixed broad-leaved forest, and CBM stood for conifer-broadleaf mixed forest.

**Table S2.** Multiple comparisons of structural metrics of the five stand types.

| Linear Hypotheses | Canopy Height        |          | Crown Base Height    |          | Canopy Volume       |          | Stand Density      |          |
|-------------------|----------------------|----------|----------------------|----------|---------------------|----------|--------------------|----------|
|                   | Estimate             | <i>p</i> | Estimate             | <i>p</i> | Estimate            | <i>p</i> | Estimate           | <i>p</i> |
| CBM – BL = 0      | -1.80                | 0.89     | -0.13                | 1.00     | 0.58                | 0.91     | -53.40             | 0.98     |
| CL – BL = 0       | 1.25                 | 0.97     | 1.00                 | 0.56     | 0.29                | 0.99     | 4.60               | 1.00     |
| EP – BL = 0       | -3.73                | 0.28     | 2.65                 | <0.001   | -1.10               | 0.54     | -235.60            | 0.10     |
| MP – BL = 0       | -4.28                | 0.10     | -1.84                | <0.05    | -0.56               | 0.88     | -265.93            | <0.05    |
| CL – CBM = 0      | 3.05                 | 0.54     | 1.12                 | 0.43     | -0.30               | 0.99     | 58.00              | 0.98     |
| EP – CBM = 0      | -1.93                | 0.85     | 2.78                 | <0.001   | -1.68               | 0.13     | -182.20            | 0.31     |
| MP – CBM = 0      | -2.48                | 0.61     | -1.72                | <0.05    | -1.15               | 0.30     | -212.53            | 0.11     |
| EP – CL = 0       | -4.98                | 0.07     | 1.66                 | 0.12     | -1.38               | 0.30     | -240.20            | 0.09     |
| MP – CL = 0       | -5.53                | <0.01    | -2.84                | <0.001   | -0.85               | 0.61     | -270.53            | <0.05    |
| MP – EP = 0       | -0.55                | 1.00     | -4.49                | <0.001   | 0.53                | 0.92     | -30.33             | 1.00     |
| Linear Hypotheses | 0–1.5 m VAI          |          | 1.5–5 m VAI          |          | 5–10 m VAI          |          | >10 m VAI          |          |
|                   | Estimate             | <i>p</i> | Estimate             | <i>p</i> | Estimate            | <i>p</i> | Estimate           | <i>p</i> |
| CBM – BL = 0      | 515.61               | 0.89     | 1016.1               | 0.21     | 660.49              | 0.68     | -769.18            | 0.37     |
| CL – BL = 0       | 805.99               | 0.60     | -1160.33             | 0.11     | 251.09              | 0.99     | -8.09              | 1.00     |
| EP – BL = 0       | 810.64               | 0.61     | -1348.74             | <0.05    | -887.60             | 0.35     | -388.82            | 0.87     |
| MP – BL = 0       | 718.14               | 0.63     | 174.83               | 0.99     | 591.28              | 0.67     | -839.23            | 0.17     |
| CL – CBM = 0      | 290.37               | 0.98     | -2176.43             | <0.001   | -409.40             | 0.93     | 761.09             | 0.38     |
| EP – CBM = 0      | 295.03               | 0.98     | -2364.84             | <0.001   | -1548.09            | <0.01    | 380.36             | 0.88     |
| MP – CBM = 0      | 202.53               | 0.99     | -841.27              | <0.27    | -69.21              | 1.00     | -70.05             | 1.00     |
| EP – CL = 0       | 4.65                 | 1.00     | -188.41              | 0.99     | -1138.69            | 0.12     | -380.73            | 0.88     |
| MP – CL = 0       | -87.84               | 1.00     | 1335.16              | <0.01    | 340.19              | 0.94     | -831.14            | 0.17     |
| MP – EP = 0       | -92.49               | 1.00     | 1523.57              | <0.001   | 1478.88             | <0.001   | -450.41            | 0.71     |
| Linear Hypotheses | 0–1.5 m Canopy Cover |          | 1.5–5 m Canopy Cover |          | 5–10 m Canopy Cover |          | >10 m Canopy Cover |          |
|                   | Estimate             | <i>p</i> | Estimate             | <i>p</i> | Estimate            | <i>p</i> | Estimate           | <i>p</i> |
| CBM – BL = 0      | 0.09                 | 0.82     | 0.11                 | 0.85     | 0.11                | 0.66     | 0.08               | 0.93     |
| CL – BL = 0       | 0.17                 | 0.24     | 0.17                 | 0.48     | 0.21                | 0.09     | 0.17               | 0.47     |
| EP – BL = 0       | 0.10                 | 0.69     | 0.06                 | 0.98     | 0.09                | 0.77     | -0.02              | 1.00     |
| MP – BL = 0       | 0.14                 | 0.32     | 0.12                 | 0.73     | 0.10                | 0.62     | -0.06              | 0.97     |
| CL – CBM = 0      | 0.08                 | 0.86     | 0.07                 | 0.97     | 0.10                | 0.77     | 0.09               | 0.91     |
| EP – CBM = 0      | 0.01                 | 1.00     | -0.05                | 0.99     | -0.02               | 1.00     | -0.10              | 0.88     |
| MP – CBM = 0      | 0.05                 | 0.96     | 0.01                 | 1.00     | -0.01               | 1.00     | -0.14              | 0.56     |

|             |       |      |       |      |       |      |       |      |
|-------------|-------|------|-------|------|-------|------|-------|------|
| EP – CL = 0 | -0.07 | 0.92 | -0.12 | 0.79 | -0.12 | 0.59 | -0.18 | 0.36 |
| MP – CL = 0 | -0.03 | 0.99 | -0.06 | 0.97 | -0.11 | 0.59 | -0.23 | 0.10 |
| MP – EP = 0 | 0.03  | 0.99 | 0.06  | 0.96 | 0.01  | 1.00 | -0.04 | 0.99 |

**Notes:** MP stood for *P. massoniana* forest, EP stood for *Pinus elliottii* forest, CL stood for *C. lanceolata* forest, BL stood for of mixed broad-leaved forest, and CBM stood for conifer-broadleaf mixed forest.

**Table S3.** Forest structural parameters of five stand types.

| Stand Type                     | Parameters | Canopy Height<br>(m) | Crown Base Height<br>(m) | Canopy Volume (m <sup>3</sup> /m <sup>2</sup> ) | Stand Density<br>(trees/ha) |
|--------------------------------|------------|----------------------|--------------------------|-------------------------------------------------|-----------------------------|
| <i>P. massoniana</i>           | Mean       | 6.97                 | 3.55                     | 2.53                                            | 289                         |
|                                | Max        | 9.36                 | 6.95                     | 4.65                                            | 515                         |
|                                | Min        | 4.46                 | 1.50                     | 0.62                                            | 136                         |
|                                | SD         | 1.39                 | 2.00                     | 1.24                                            | 131.44                      |
| <i>P. elliottii</i>            | Mean       | 7.52                 | 6.83                     | 2.00                                            | 319                         |
|                                | Max        | 9.28                 | 9.48                     | 2.42                                            | 348                         |
|                                | Min        | 4.86                 | 5.03                     | 1.53                                            | 291                         |
|                                | SD         | 1.54                 | 1.88                     | 0.39                                            | 24.61                       |
| <i>C. lanceolata</i>           | Mean       | 12.50                | 5.17                     | 3.38                                            | 559                         |
|                                | Max        | 15.08                | 6.85                     | 5.13                                            | 830                         |
|                                | Min        | 9.29                 | 3.78                     | 1.80                                            | 178                         |
|                                | SD         | 2.13                 | 1.11                     | 1.50                                            | 269.55                      |
| Mixed broad-leaved forest      | Mean       | 11.25                | 4.18                     | 3.10                                            | 555                         |
|                                | Max        | 21.15                | 5.62                     | 4.30                                            | 914                         |
|                                | Min        | 6.58                 | 3.35                     | 1.68                                            | 214                         |
|                                | SD         | 6.36                 | 0.96                     | 1.06                                            | 259.15                      |
| Conifer-broadleaf mixed forest | Mean       | 9.45                 | 4.05                     | 3.68                                            | 501                         |
|                                | Max        | 17.45                | 5.45                     | 5.21                                            | 632                         |
|                                | Min        | 6.37                 | 3.00                     | 2.17                                            | 392                         |
|                                | SD         | 4.68                 | 1.03                     | 1.20                                            | 109.12                      |

**Notes:** Max is the maximum value, Min is the minimum value, and SD is the standard deviation.

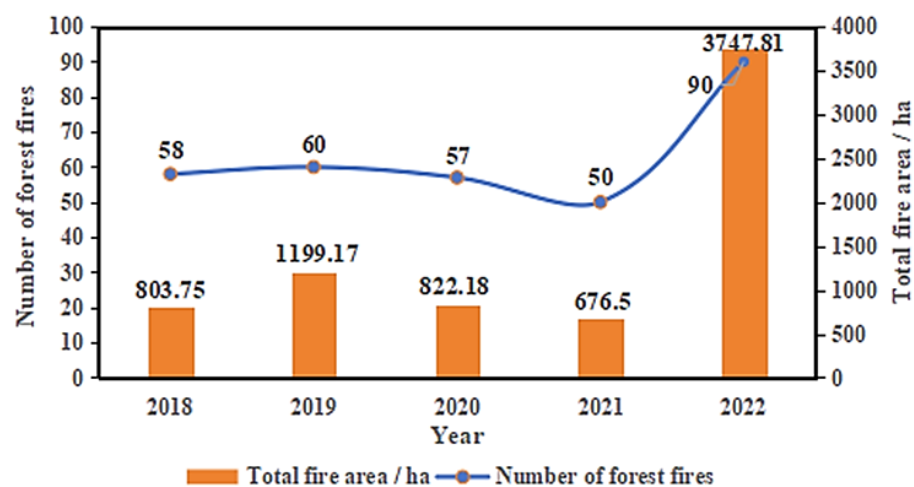

**Figure S1.** Number of wildfires in southern Jiangxi in recent five years (Data from National Bureau of Statistics: <https://www.stats.gov.cn/>).

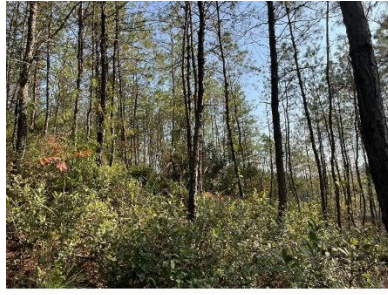

*Pinus massoniana* forest

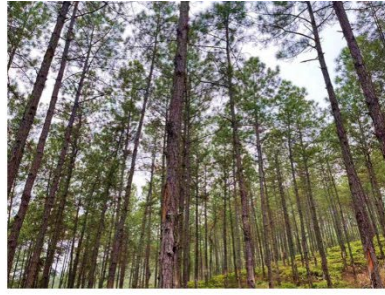

*Pinus elliottii* forest

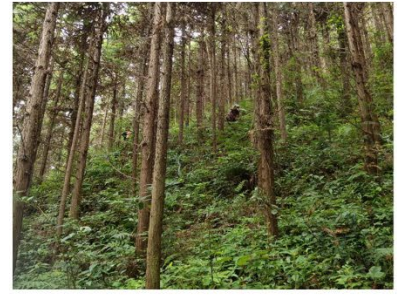

*Cunninghamia lanceolata* forest

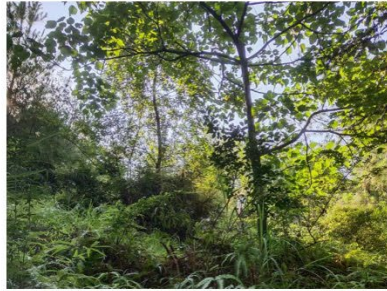

Broadleaf mixed forest

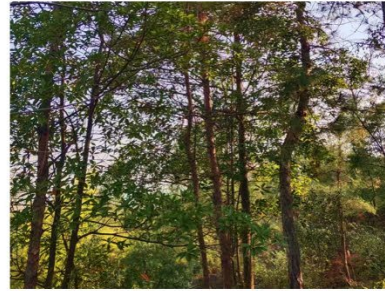

Conifer-broadleaf mixed forest

Figure S2. Field photos of each stand type.

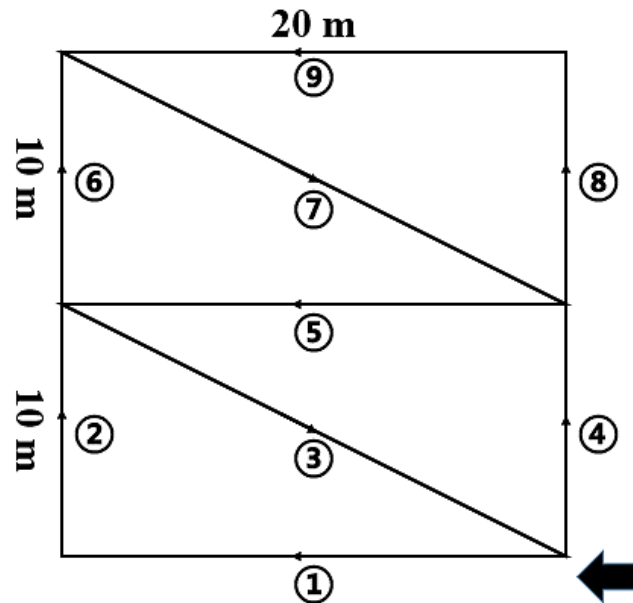

Figure S3. LiDAR scanning route.

### Crown Base Height (CBH) Calculation Program:

The CBH is defined as the distance along the stem from ground to the attachment point of the first living branch. Accurate CBH information is essential for forest and fire managers. The voxel-based method applied in this study is based exclusively on the vertical point height distribution, and each voxel contained a single value of the number of included LiDAR returns. The CBH was determined by analyzing the distribution curve of the frequency of the vertical profile points and finding the height where the mutation inflection point (Figure S3) was located.

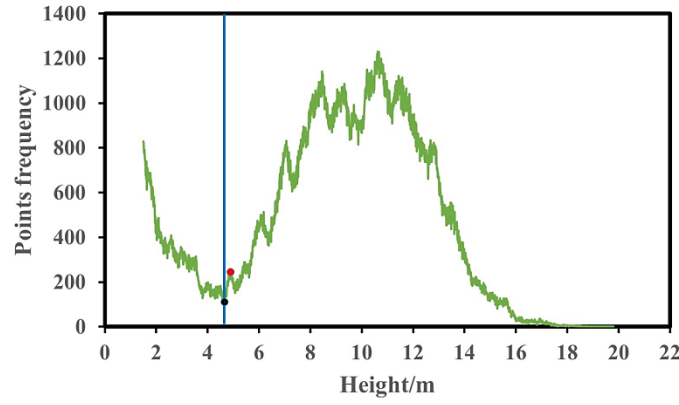

**Figure S4.** A vertical point frequency curve distribution (green line) graph of one plot. X axis is the tree height and Y axis is the point frequency of the voxels. The green line represents the smoothed point frequency values. Black and red colored points refer to the visual detected local minima and maxima respectively. The vertical blue line shows the estimated CBH (i.e., the height of the voxel, the point frequency of which is the local minima before the first significant local maxima).

**QQ plot:**

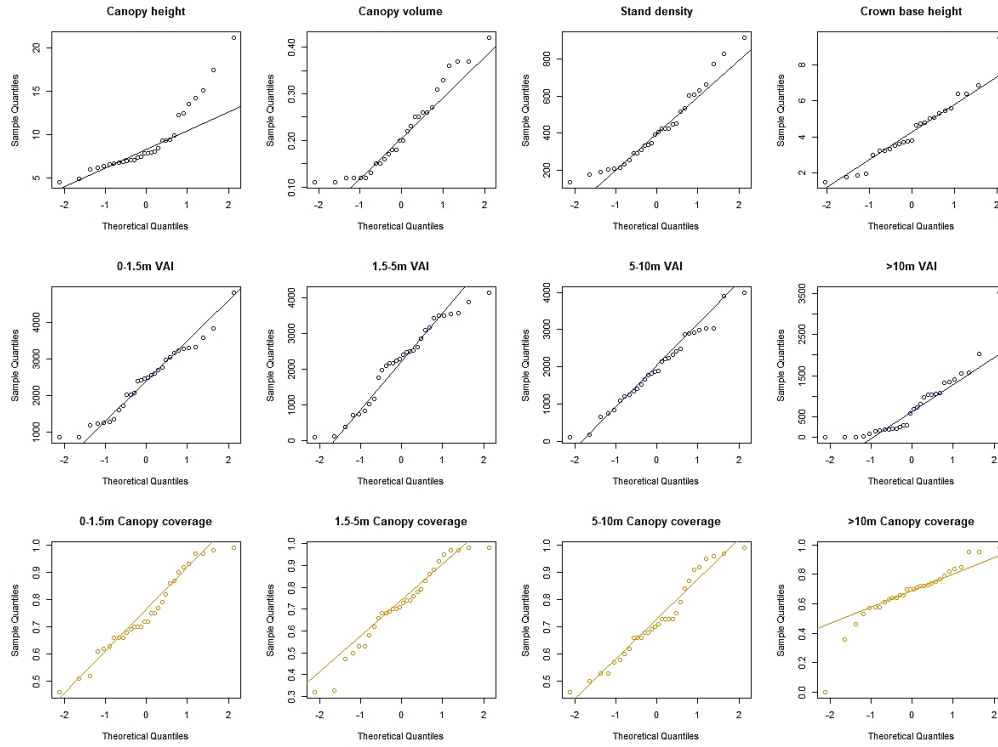

**Figure S5.** Quantile-Quantile plot: examine whether the extracted parameters of each forest stand follow a normal distribution.
